# Supplementary material for: Non-invasive molecularly-specific millimeter-resolution manipulation of brain circuits by ultrasound-mediated aggregation and uncaging of drug carriers
Source: PubMed Central journal article supplement (PMC7529901; doi:10.1038/s41467-020-18059-7), 2020-10-01
Supplement: 41467_2020_18059_MOESM1_ESM.pdf [file 41467_2020_18059_MOESM1_ESM.pdf]

Supplementary information

**Non-invasive molecularly-specific millimeter-resolution manipulation of brain circuits by ultrasound-mediated aggregation and uncaging of drug carriers**

Ozdas, Shah, Johnson et al.

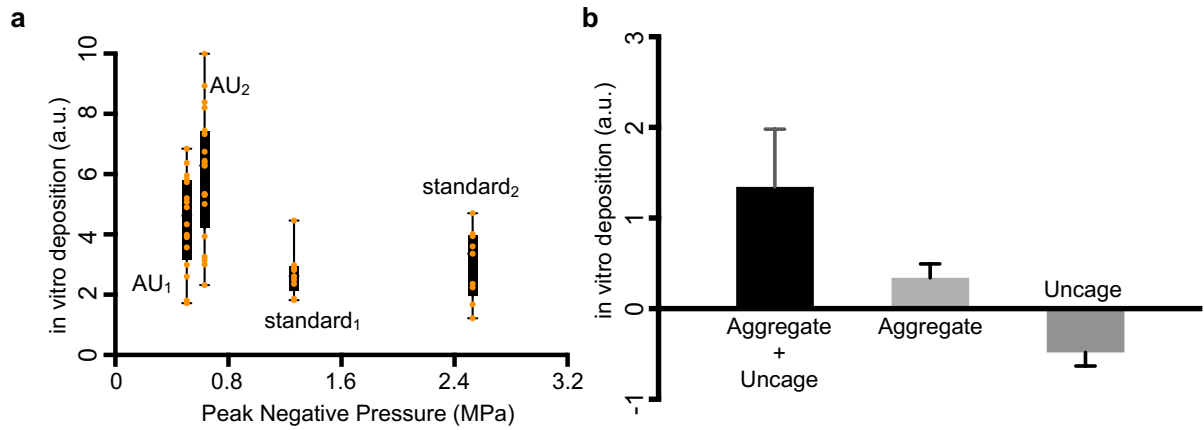

**Supplementary Figure 1: In vitro assessment of drug deposition in microdialysis tubing using standard<sub>1,2</sub>-FUS versus AU-FUS sequences**

**a** Deposition of fluorescein released from UC-carriers in agarose around microdialysis tubing (normalized fluorescence; see Methods) after multi-component AU-FUS [AU<sub>1</sub>-FUS (in vitro) (n = 16), AU<sub>2</sub>-FUS (in vitro) (n = 20)] and single-component standard-FUS [standard<sub>1</sub>-FUS (n = 9), standard<sub>2</sub>-FUS (n = 9)]. See Table 1 for parameters. All data is represented as a box-and-whisker plot [min to max, showing all points (orange)].

**b** Deposition of fluorescein released from UC-carriers in agarose around microdialysis tubing (normalized fluorescence; see Methods) after AU<sub>3</sub>-FUS (in vitro) sequence components. Both the radiation and uncaging pulses are required for efficient release (see parameters in Table 1). All data is mean ± s.e.m. (n = 16 for aggregate + uncage, n = 11 for aggregate only, n = 16 for uncage only). Note: These pressures are the same as AU-FUS<sub>in vivo</sub>, accounting for skull attenuation.

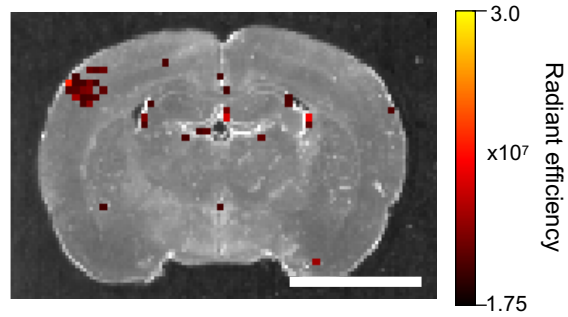

**Supplementary Figure 2: In vitro optimized AU-FUS sequence causes BBB opening in vivo.** IVIS spectrum imaging of Evans Blue dye extravasation following AU<sub>1</sub>-FUS (in vitro) parameters optimized under in vitro conditions. BBB opening is observed in vS1 in the ipsilateral side to AU<sub>1</sub>-FUS (in vitro) treatment. FUS parameters shown in Table 1 of main text ["AU<sub>1</sub>-FUS (in vitro)"]; P<sub>U</sub> was slightly lower (0.45 vs 0.5 MPa shown in Table 1). Scale bar is 0.5 cm.

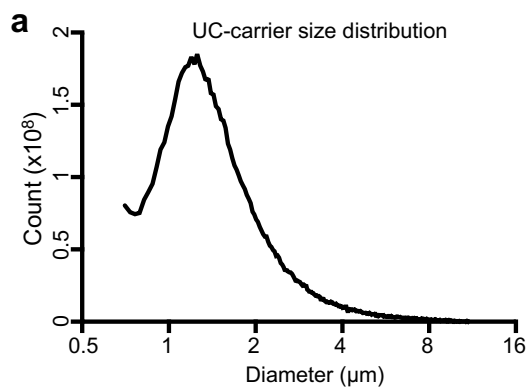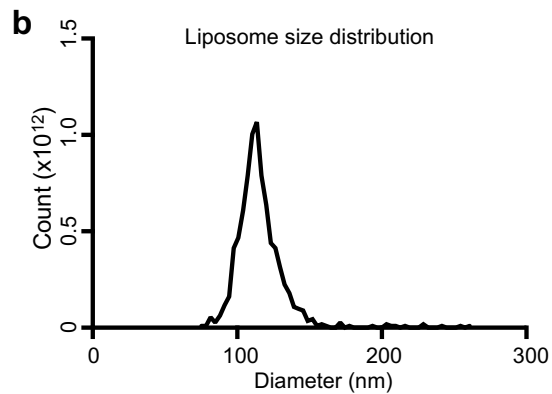

**Supplementary Figure 3: Characterization of UC-carrier and liposome size distributions.**  
**a** Representative example of size distribution of UC-carriers with a mean diameter of 1.713  $\mu\text{m}$ .  
**b** Representative example of drug-loaded liposomes with mean diameter of 116 nm.

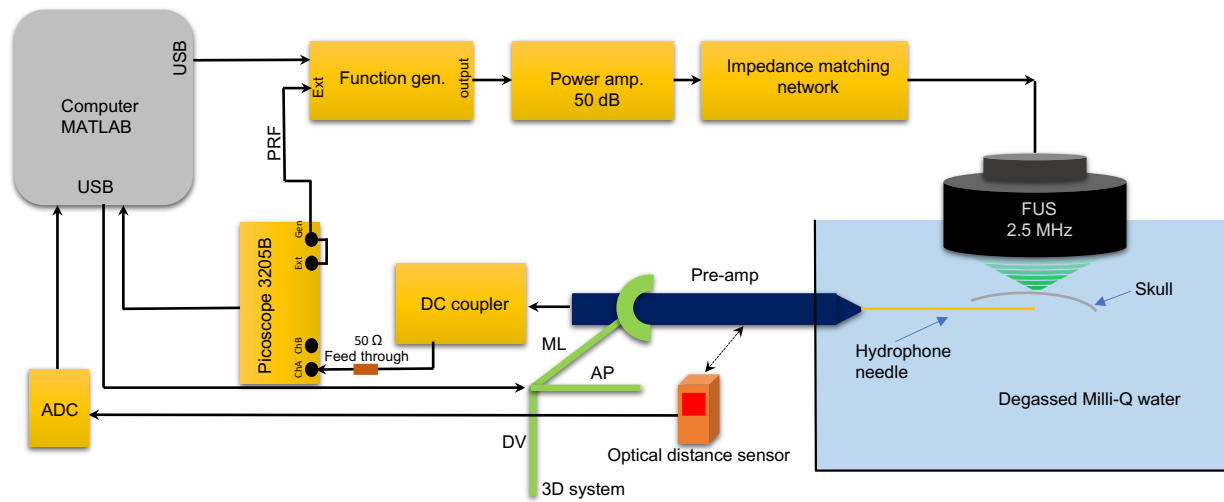

**Supplementary Figure 4: Schematic illustration of system for automated pressure mapping to measure the effects of skull on FUS.**  
See Methods for further details.

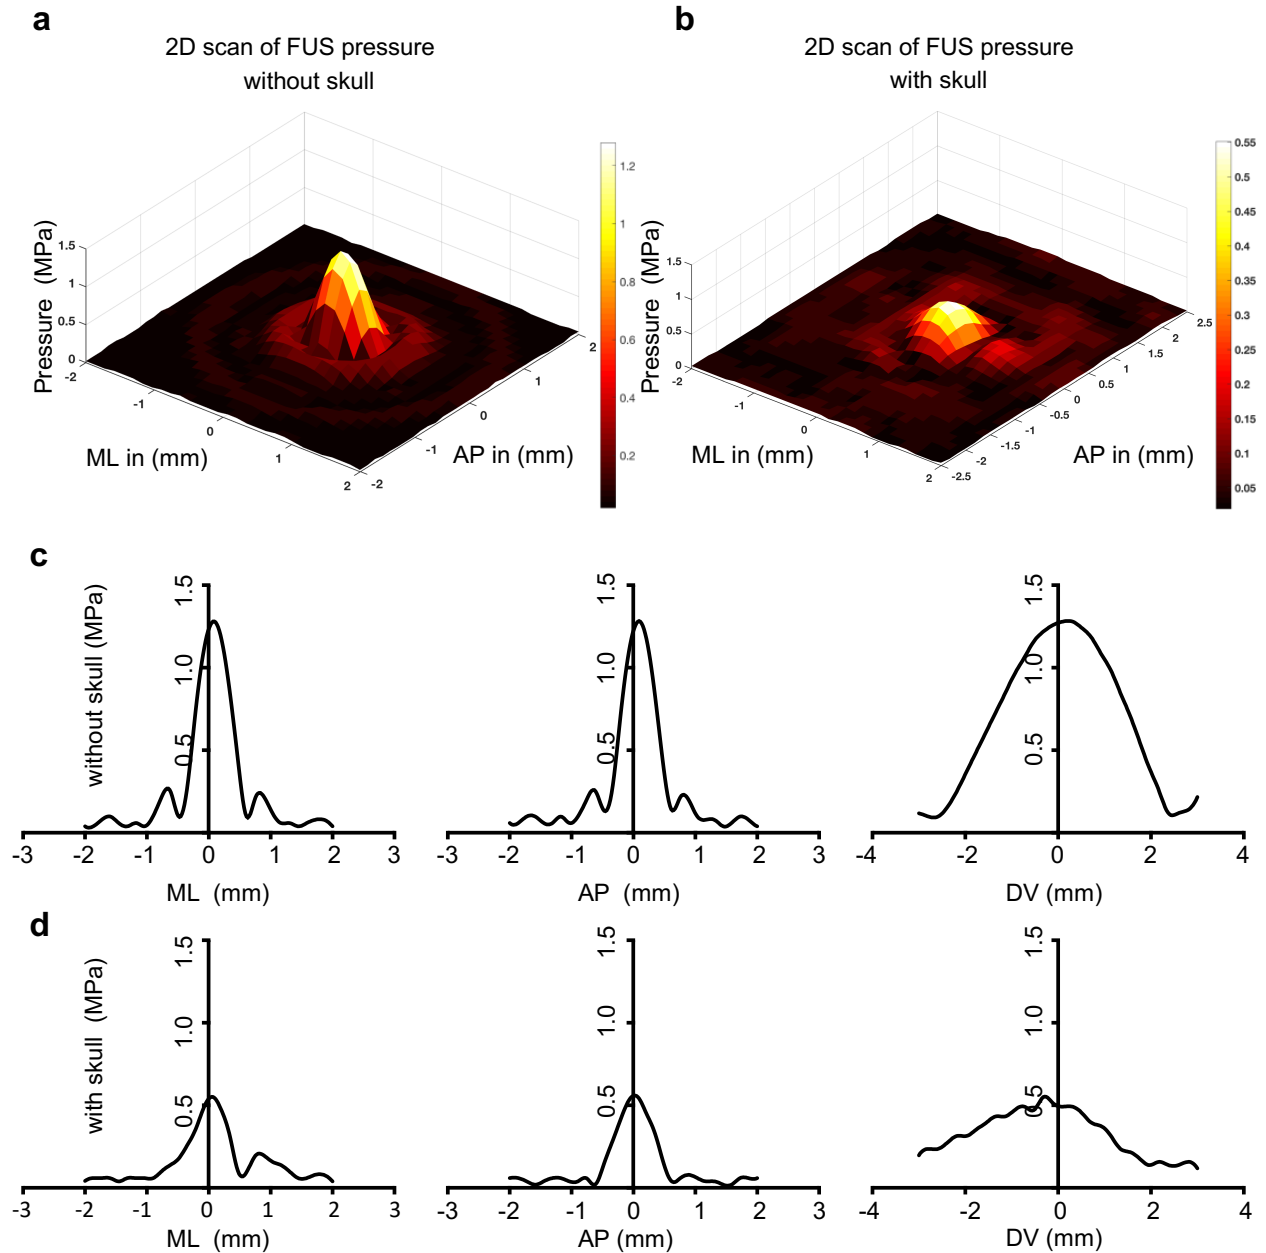

**Supplementary Figure 5: 2D and 1D Scan of FUS waves with and without skull to determine the attenuation of FUS by the skull.**

Intensity profile of the FUS transducer at focal plane: **a** without skull. **b** with skull.

FUS pressure intensity profiles along three axis (ML, AP, DV): **c** without skull. **d** with skull.

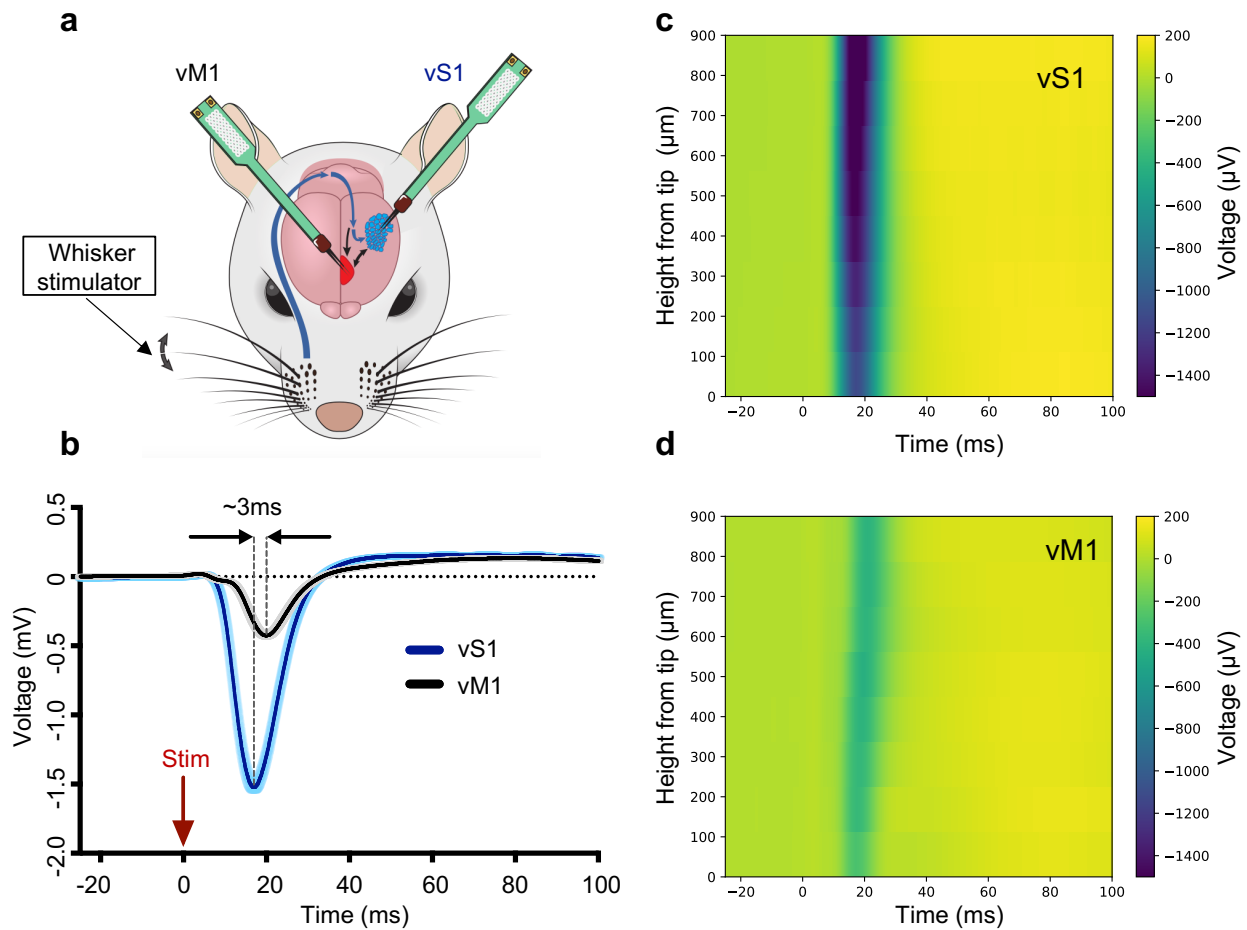

**Supplementary Figure 6: wEPs recorded simultaneously from vS1 and vM1 following whisker stimulation shows directional propagation of neural activity from vS1 to vM1.**

**a** Schematic illustration of experimental setup.

**b** Average of all wEPs (whisker deflection at 1 Hz for 8 mins, deflection at  $t = 0$  ms) recorded simultaneously from vM1 (black) and vS1 (blue). Data shown is from strongest responding electrode in vM1 and vS1 in one animal. Note ~3 ms difference in latency between the peaks of wEPs from vS1 and vM1, consistent with previous data<sup>49</sup>. Data is mean  $\pm$  s.e.m.

**c** Heatmap for one shank of the probe in vS1.

**d** Heatmap for one shank of the probe in vM1.

Heatmaps show the peak negative amplitude of the average of wEPs ( $\mu\text{V}$ ) for all 8 electrodes (100  $\mu\text{m}$  vertical spacing from tip-the most ventral electrode) in the probe shank following whisker deflection.

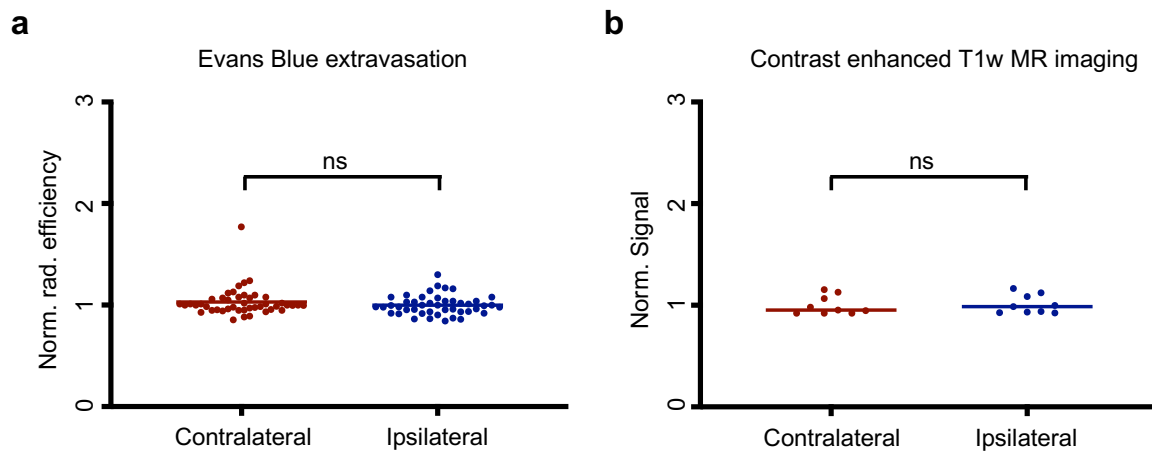

**Supplementary Figure 7: No indication of BBB opening during sonication with AU-FUS as measured by Evans Blue or Gadolinium extravasation.**

**a** Evans blue was injected immediately before sonication and allowed to circulate for 2-h post-sonication before transcatheter perfusion. Regions of interest (ROIs) (1.5 mm x 3.5 mm, blue) were measured as radiant efficiency [(photons sec<sup>-1</sup> cm<sup>-2</sup> sr<sup>-1</sup>) per (μW cm<sup>-2</sup>)] ipsilateral to FUS application on vS1 and were compared to the contralateral vS1 on brain sections imaged with the IVIS spectrum. Radiant efficiency values within ROIs for AU-FUS were quantified [n = 45 (3 rats x 15 brain sections)]. Pairwise Mann-Whitney rank sum test AU-FUS (ipsilateral vs. contralateral, p= 0.3477).

**b** Animals were injected with Omniscan immediately before sonication and imaged after sonication. ROIs (1.0 mm x 1.0 mm, blue, approximate ROI location) were measured as signal enhanced T1-weighted MR images, following Gd administration, ipsilateral to FUS application, which were compared to the contralateral vS1. Ratio (ipsilateral to contralateral) of contrast enhanced T1-weighted MR image ROIs using AU-FUS were quantified [n = 9 (3 rats x 3 brain sections)]. Pairwise Mann-Whitney rank sum test, AU-FUS (ipsilateral vs. contralateral, p= 0.6048).



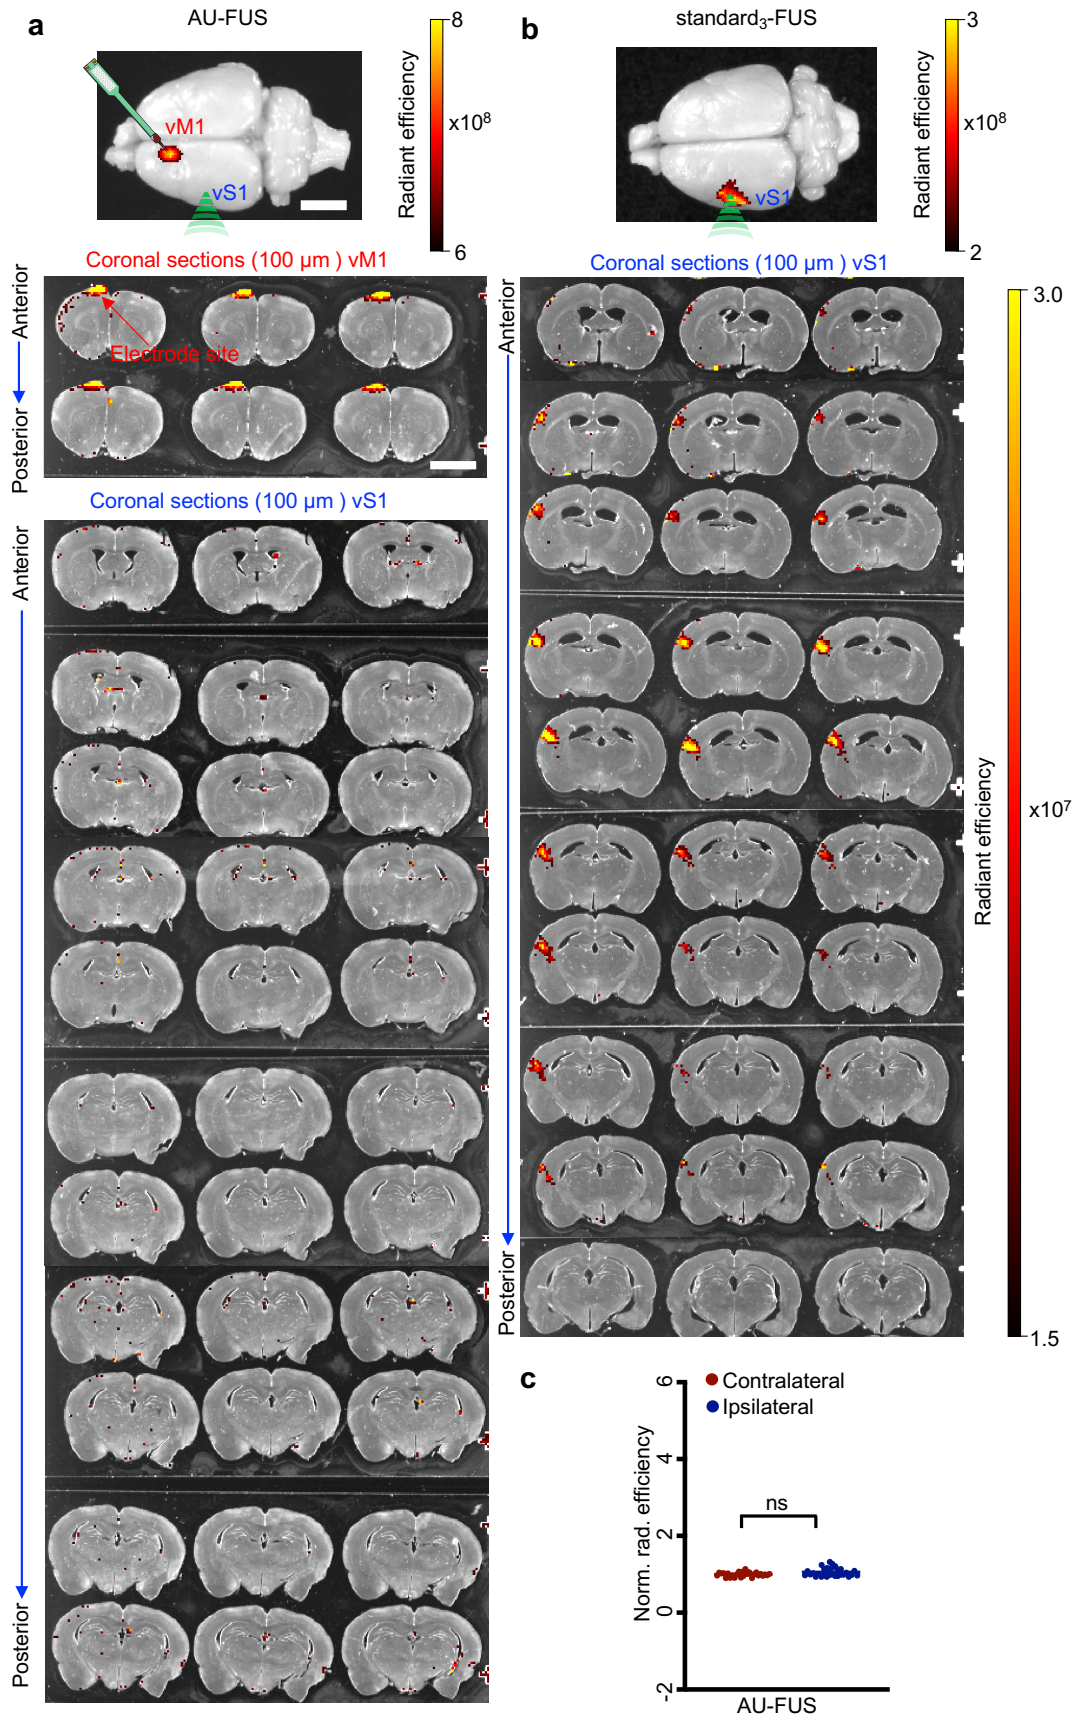

**Supplementary Figure 8: Strong Evans Blue extravasation in the FUS focal volume after standard<sub>3</sub>-FUS, but not AU-FUS treatment of vS1.**

**a** Top: IVIS spectrum whole-brain imaging of a representative animal treated with AU-FUS and UC-carriers on vS1 (Note: The hot spot seen in the vM1 is due to electrode insertion). Evans Blue was allowed to circulate for 2 hrs before perfusion. Middle: Evans Blue extravasation in electrode insertion site in vM1 from the brain shown above. Bottom: Coronally sectioned IVIS spectrum images of focal area after AU-FUS treatment.

**b** Top: IVIS spectrum whole brain imaging of a representative animal treated with standard<sub>3</sub>-FUS and UC-carriers on vS1. Bottom: Coronally sectioned IVIS spectrum images of focal area after standard<sub>3</sub>-FUS treatment.

**c** Normalized radiant efficiency values within ROIs for AU-FUS [ $n = 30$  (2 rats x 15 brain sections)]. Pairwise Mann-Whitney rank sum test AU-FUS (ipsilateral vs. contralateral,  $p = 0.1666$ ).

Serial sections are arranged left → right and top → bottom (anterior → posterior).

Scale bar is 0.5 cm.

**a**

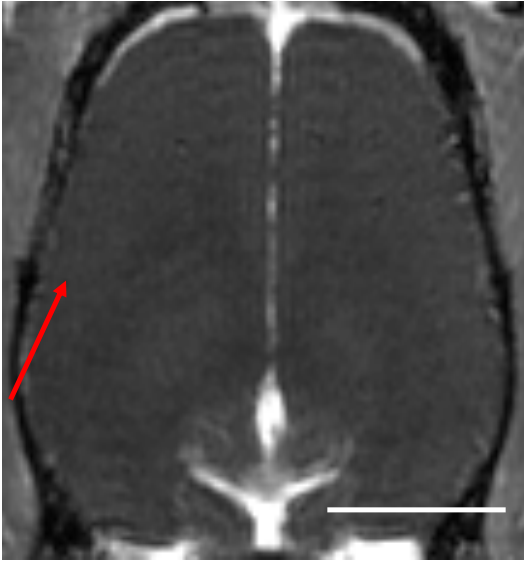

AU-FUS

**b**

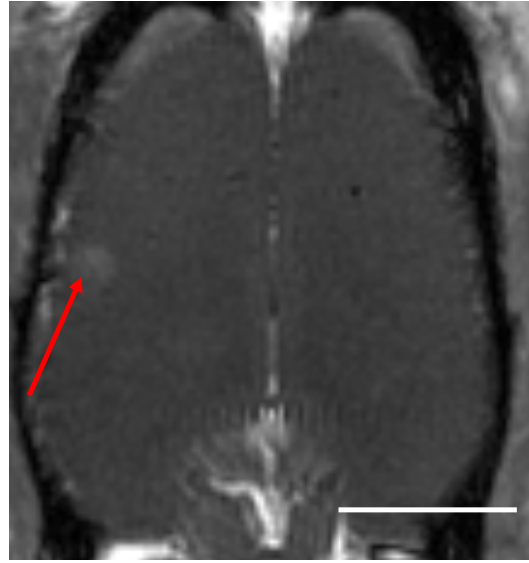

standard<sub>3</sub>-FUS

**Supplementary Figure 9: Enlarged images from Fig. 5b showing contrast enhancement following standard<sub>3</sub>-FUS, but not AU-FUS treatment.**

**a** AU-FUS (left; red arrow)

**b** standard<sub>3</sub>-FUS (right; red arrow).

Scale bar is 0.5 cm.

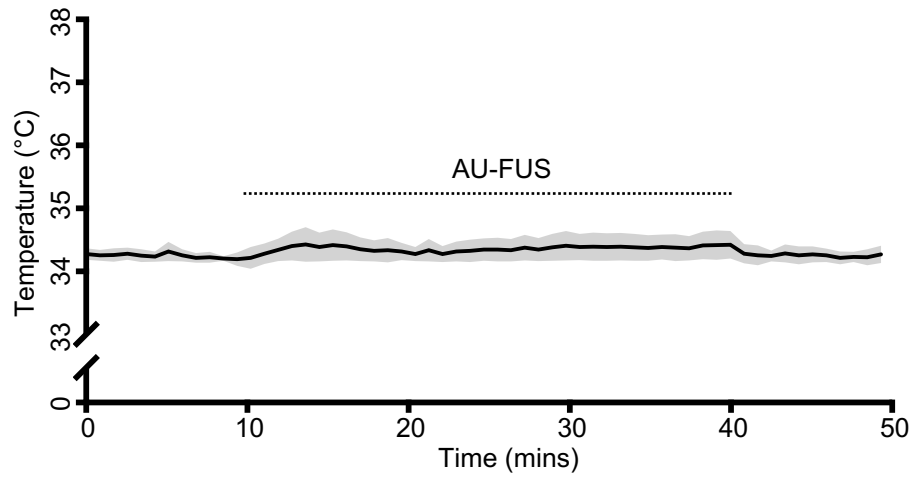

**Supplementary Figure 10: Time course of local brain temperature during AU-FUS treatment with UC-carriers shows negligible temperature increase.**

A thermocouple sensor was inserted at an angle below the skull to vS1 and the FUS transducer was positioned above. AU-FUS treatment was done through intact skull and temperature was monitored for baseline (0-10 mins), AU-FUS treatment (10-40 mins), and post-AU-FUS treatment periods (40-50 mins). The average change in temperature during AU-FUS treatment was negligible (0.12°C). All data is mean  $\pm$  s.e.m. n = 3 rats.

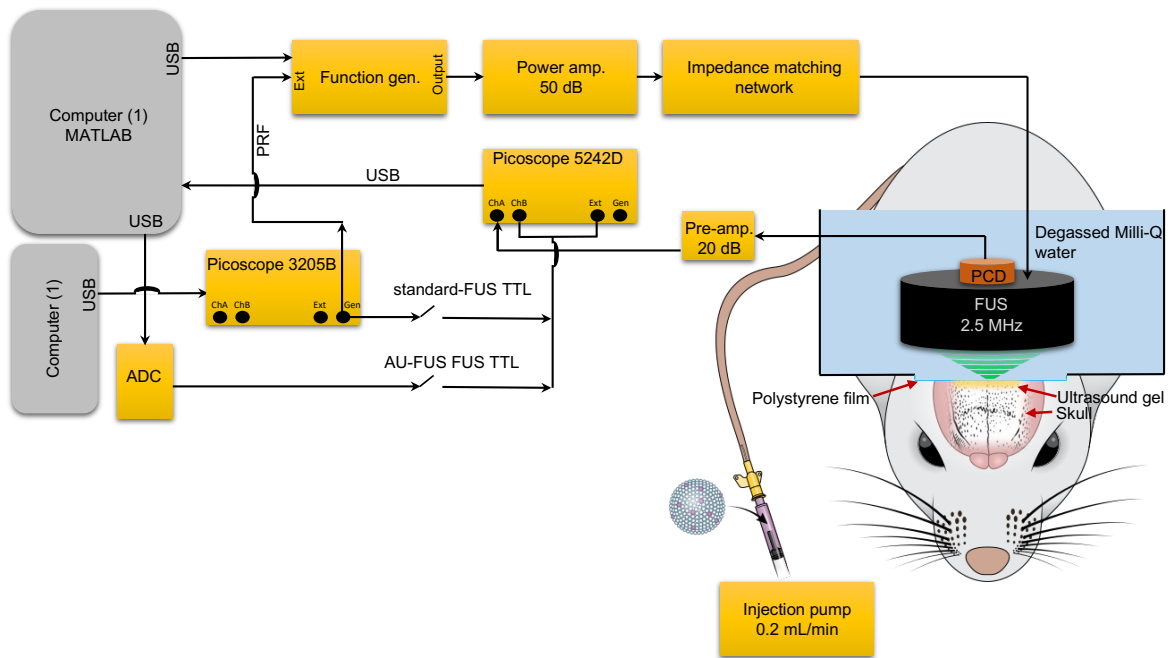

**Supplementary Figure 11: Schematic illustration of system for passive cavitation detection of UC-carriers in vivo.**  
See Methods for further details.

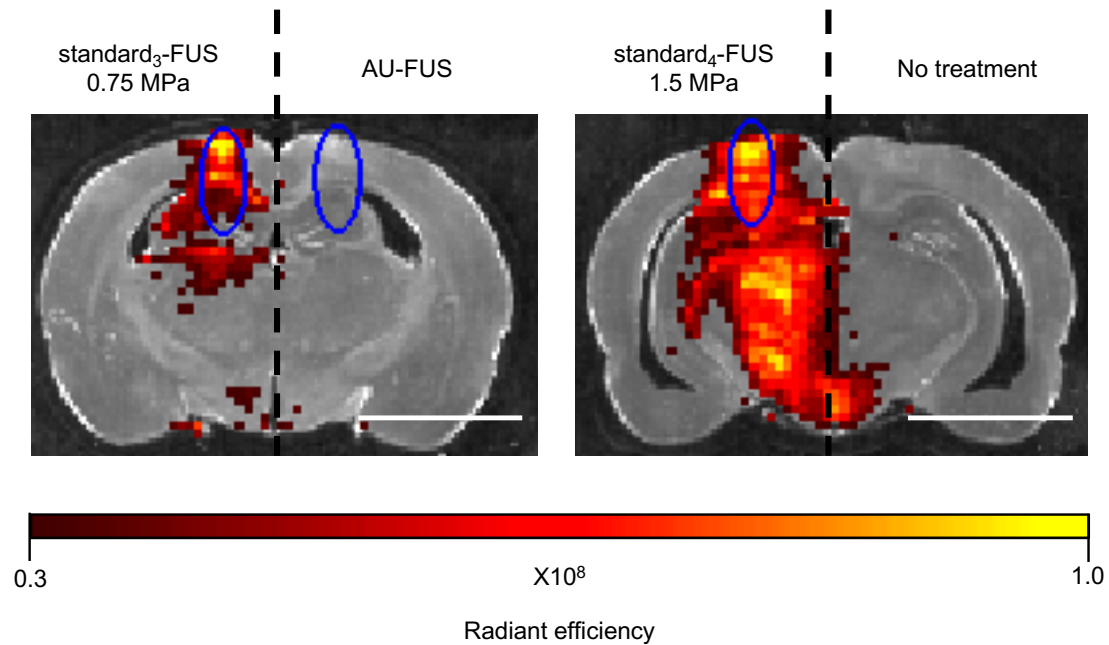

**Supplementary Figure 12: BBB opening as predicted by stable and inertial cavitation signals from passive cavitation detection (PCD) measurements.**

Evans blue extravasation is observed with standard<sub>3</sub>-FUS (left hemisphere of brain section on the left; see FFT in Fig. 6b) and standard<sub>4</sub>-FUS (left hemisphere of brain section on the right; see FFT in Fig. 6a), but not AU-FUS (right hemisphere of brain section on the left; see FFTs in Fig. 6c & d). Passive cavitation detection analysis indicated stable cavitation with standard<sub>3</sub>-FUS and inertial cavitation with standard<sub>4</sub>-FUS. Brain sections are from the PCD data presented from one animal in Fig. 6a-d. Blue ROIs indicate the focal area. Scale bar is 5 mm.

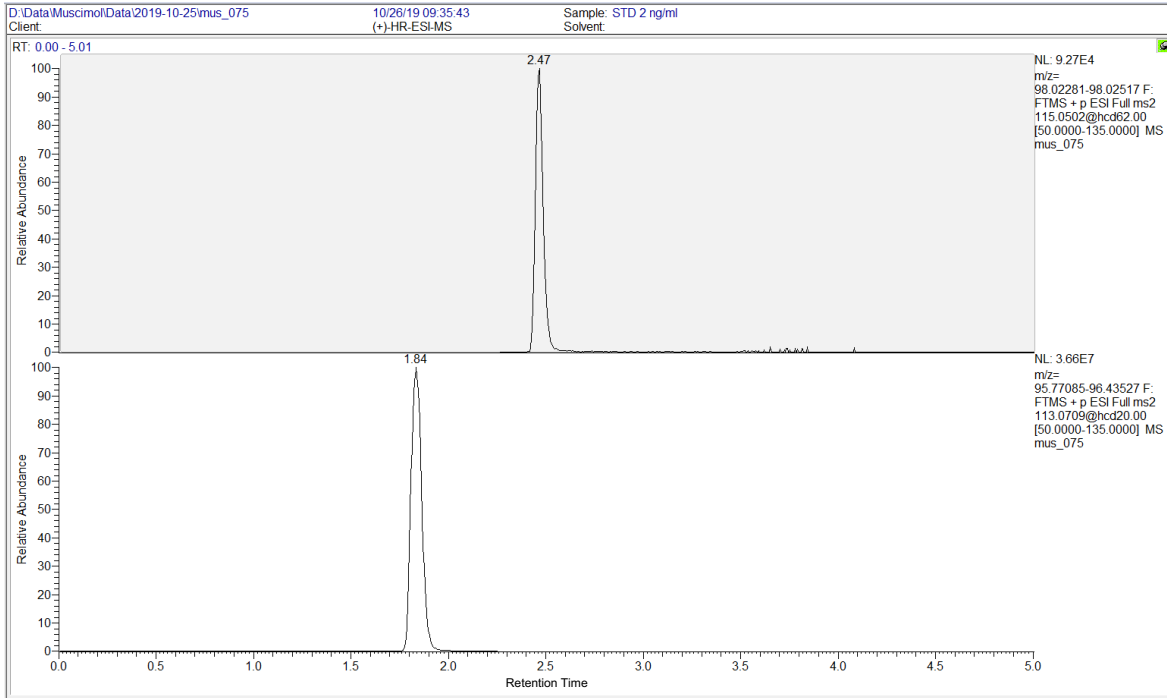

**Supplementary Figure 13: Chromatograms of ISTD at 200 ng mL<sup>-1</sup> (top) and muscimol standard solution at 2 ng mL<sup>-1</sup> (bottom) concentration measured with LC-HR-MS/MS.**

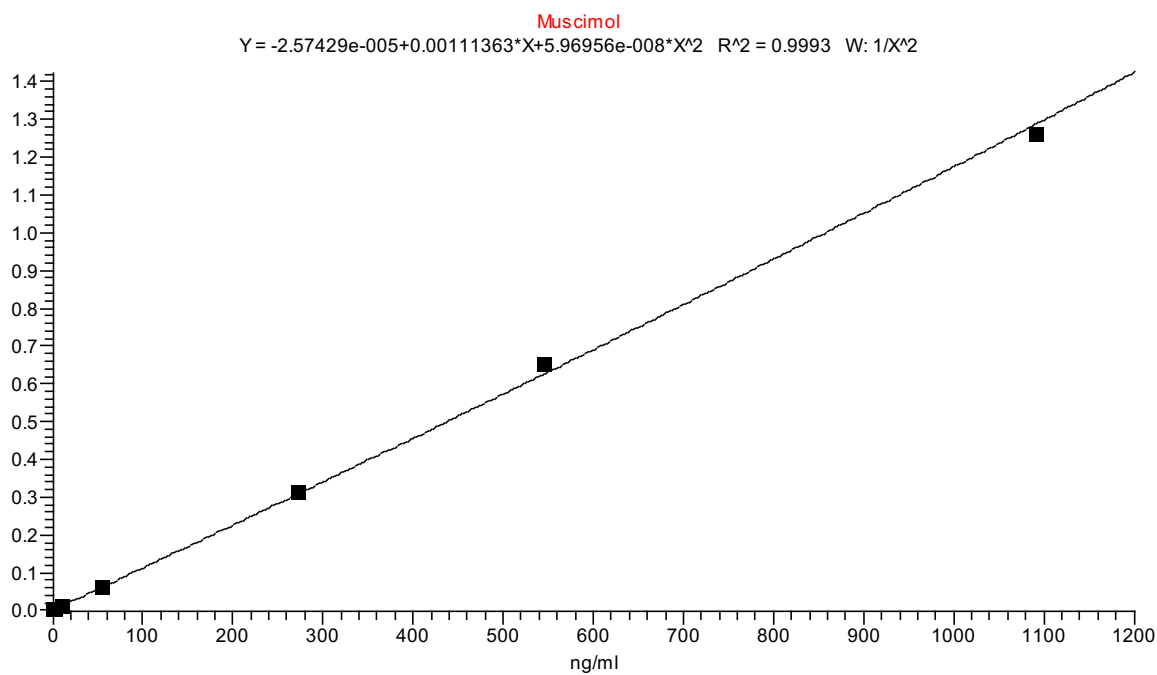

**Supplementary Figure 14: Calibration curve of muscimol standard solutions used for quantification.**



### Supplementary Table 1

#### Preparation of the standard and ISTD solutions used for quantification.

| Initial weight                             |             |            |           |                              |                             |
|--------------------------------------------|-------------|------------|-----------|------------------------------|-----------------------------|
|                                            | Volume [mL] | Calc. [mg] | Eff. [mg] | Calc. [ng mL <sup>-1</sup> ] | Eff. [ng mL <sup>-1</sup> ] |
| Muscimol                                   | 10          | 2.00000    | 2.185     | 200'000                      | 218'500                     |
| (3-methyl-1,2-oxazol-5-yl) methanamin ISTD | 2           | 0.20000    | 0.232     | 100'000                      | 116'000                     |

| Muscimol       |                                    |                                   |             |                       |  |
|----------------|------------------------------------|-----------------------------------|-------------|-----------------------|--|
| Solutions      | Conc. calc. [ng mL <sup>-1</sup> ] | Conc. eff. [ng mL <sup>-1</sup> ] | Volume [mL] | Volume aliquot        |  |
| SL_(Muscimol)  | 200'000                            | 218'500                           |             |                       |  |
| WS1_(Muscimol) | 10'000                             | 10'925                            | 1           | 50 µL SL_(Muscimol)   |  |
| WS2_(Muscimol) | 500                                | 546                               | 1           | 50 µL WS1_(Muscimol)  |  |
| WS3_(Muscimol) | 25                                 | 27.3                              | 1           | 50 µL WS2_(Muscimol)  |  |
| STD 1          | 0.50                               | 0.546                             | 1           | 20 µL WS3_(Muscimol)  |  |
| STD 2          | 2.00                               | 2.185                             | 1           | 80 µL WS3_(Muscimol)  |  |
| STD 3          | 10.00                              | 10.925                            | 1           | 20 µL WS2_(Muscimol)  |  |
| STD 4          | 50.00                              | 54.625                            | 1           | 100 µL WS2_(Muscimol) |  |
| STD 5          | 250.00                             | 273.125                           | 1           | 25 µL WS1_(Muscimol)  |  |
| STD 6          | 500.00                             | 546.250                           | 1           | 50 µL WS1_(Muscimol)  |  |
| STD 7          | 1'000.00                           | 1'092.500                         | 1           | 100 µL WS1_(Muscimol) |  |

| ISTD       |                                    |                                   |             |                   |  |
|------------|------------------------------------|-----------------------------------|-------------|-------------------|--|
| Solutions  | Conc. calc. [ng mL <sup>-1</sup> ] | Conc. eff. [ng mL <sup>-1</sup> ] | Volume [mL] | Volume aliquot    |  |
| SL_(ISTD)  | 100'000                            | 116'000                           |             |                   |  |
| WS1_(ISTD) | 4'000                              | 4'640.00                          | 10          | 400 µL SL_(ISTD)  |  |
| STD 1      | 200.0                              | 232.00                            | 1           | 50 µL WS1_(ISTD)  |  |
|            | 200.0                              | 232.00                            | 3           | 150 µL WS1_(ISTD) |  |

## Supplementary Table 2

### Weighted and measured concentrations.

| Weighted concentration<br>[ng mL <sup>-1</sup> ] | Measured concentration<br>[ng mL <sup>-1</sup> ] | % Diff |
|--------------------------------------------------|--------------------------------------------------|--------|
| 0.546                                            | 0.548                                            | 0%     |
| 2.19                                             | 2.16                                             | -1%    |
| 10.9                                             | 10.6                                             | -3%    |
| 54.6                                             | 54.9                                             | 1%     |
| 273                                              | 276                                              | 1%     |
| 546                                              | 569                                              | 4%     |
| 1093                                             | 1068                                             | -2%    |
