# Supplementary material for: Non-invasive molecularly-specific millimeter-resolution manipulation of brain circuits by ultrasound-mediated aggregation and uncaging of drug carriers
Source: PubMed Central journal article supplement (PMC7529901; doi:10.1038/s41467-020-18059-7), 2020-10-01
Supplement: 41467_2020_18059_MOESM3_ESM.pdf [file 41467_2020_18059_MOESM3_ESM.pdf]

### Description of Additional Supplementary Files

File Name: Supplementary Movie 1

Description: **Representative movie of aggregation and uncaging of model drug (fluorescein) from UC-carriers by AU-FUS.** UC-carriers were infused into microdialysis tubing while a sequence similar to AU<sub>3</sub>-FUS (in vitro) was applied [for visualization purposes,  $t_A$ (ms),  $t_U$ (ms),  $P_U$ (MPa), and NOC were changed to 1.8s, 180 ms, 1MPa, and 10000 cycles, respectively].
